# Supplementary material for: Fear of COVID-19 and Trust in the Healthcare System Mediates the Association between Individual’s Risk Perception and Preventive COVID-19 Behaviours among Iranians
Source: MDPI journal article supplement (doi:10.3390/ijerph182212146), 2021-11-19
Supplement: s1 [file s1]

### Supplementary Analyses

*Table S1. Items for all study measures with descriptive statistics, reliability coefficients, factor loadings, and average variance extracted statistics*

| Construct; Mean (SD)          | Measurement item                                                                                                    | $\lambda$ | $\alpha$ | $\omega$ | CR    | AVE   |
|-------------------------------|---------------------------------------------------------------------------------------------------------------------|-----------|----------|----------|-------|-------|
| Trust                         | The healthcare system makes patients' health better                                                                 | 0.750     | 0.818    | 0.803    | 0.88  | 0.46  |
|                               | The healthcare system covers up its mistakes                                                                        | 0.522     |          |          |       |       |
|                               | Patients receive high-quality care from the healthcare system                                                       | 0.648     |          |          |       |       |
|                               | The healthcare system makes too many mistakes                                                                       | 0.793     |          |          |       |       |
|                               | The healthcare system puts making money above patients' needs                                                       | 0.689     |          |          |       |       |
|                               | The healthcare system gives excellent medical care.                                                                 | 0.728     |          |          |       |       |
|                               | Patients get same medical treatment regardless of race                                                              | 0.552     |          |          |       |       |
|                               | The healthcare system lies to make money                                                                            | 0.774     |          |          |       |       |
|                               | The healthcare system experiments on patients without them knowing                                                  | 0.580     |          |          |       |       |
| Perceived risk                | Compared to most people your age and sex, what would you say your chances are for developing coronavirus?           | 0.670     | 0.768    | 0.776    | 0.746 | 0.495 |
|                               | How risky would it be for you if you think that you have coronavirus symptoms?                                      | 0.709     |          |          |       |       |
|                               | In general, how serious do you think COVID-19 is?                                                                   | 0.731     |          |          |       |       |
| Preventive COVID-19 behaviors | Regularly and thoroughly clean your hands with an alcohol-based hand rub or wash them with soap and water           | 0.712     | 0.792    | 0.816    | 0.877 | 0.591 |
|                               | Practice respiratory hygiene (covering your mouth and nose with your bent elbow or tissue when you cough or sneeze) | 0.730     |          |          |       |       |
|                               | Maintain at least one meter (3 feet) distance between yourself and anyone                                           | 0.640     |          |          |       |       |

|      |                                                                                                  |       |       |       |       |       |
|------|--------------------------------------------------------------------------------------------------|-------|-------|-------|-------|-------|
|      | who is coughing or sneezing                                                                      |       |       |       |       |       |
|      | Stay home if you feel unwell                                                                     | 0.866 |       |       |       |       |
|      | Avoid touching eyes, nose, and mouth                                                             | 0.872 |       |       |       |       |
| Fear | I am most afraid of coronavirus-19                                                               | 0.657 | 0.886 | 0.884 | 0.881 | 0.516 |
|      | It makes me uncomfortable to think about coronavirus-19.                                         | 0.703 |       |       |       |       |
|      | My hands become clammy when I think about coronavirus-19                                         | 0.710 |       |       |       |       |
|      | I am afraid of losing my life because of coronavirus-19                                          | 0.682 |       |       |       |       |
|      | When watching news and stories about coronavirus-19 on social media, I become nervous or anxious | 0.743 |       |       |       |       |
|      | I cannot sleep because I'm worrying about getting coronavirus-19                                 | 0.751 |       |       |       |       |
|      | My heart races or palpitates when I think about getting coronavirus-19                           | 0.778 |       |       |       |       |

*Note.*  $\lambda$  = Standardized factor loading from structural equation model;  $\alpha$  = Cronbach's alpha reliability coefficient;  $\omega$  = McDonald's omega reliability coefficient; CR = Composite reliability; AVE = Average variance extracted from structural equation model.
